# Supplementary material for: Intracluster correlation coefficients in the Greater Mekong Subregion for sample size calculations of cluster randomized malaria trials
Source: PubMed Central journal article supplement (PMC6921387; doi:10.1186/s12936-019-3062-x), 2019-12-18

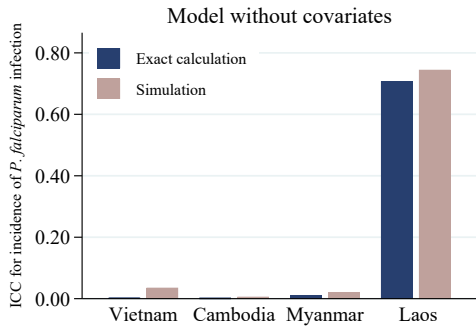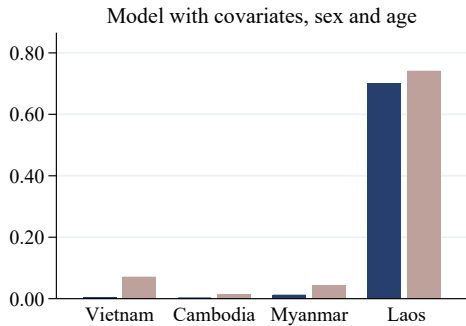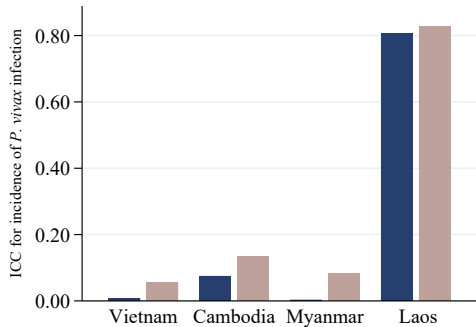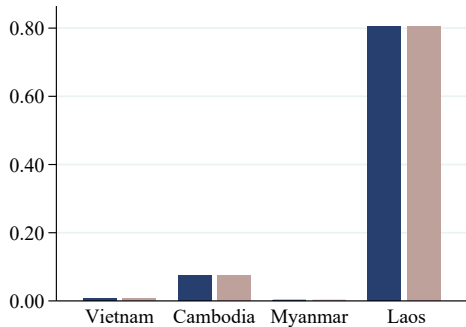

Supplement: 12936_2019_3062_MOESM2_ESM.pdf [file 12936_2019_3062_MOESM2_ESM.pdf]
